# Supplementary material
Source: PubMed Central journal article supplement (PMC6692693)
Supplement: jamainternmed-179-1543-s001.pdf [file jamainternmed-179-1543-s001.pdf]

## Supplementary Online Content

Sun EC, Mello MM, Moshfegh J, Baker LC. Assessment of out-of-network billing for privately insured patients receiving care in in-network hospitals. *JAMA Intern Med*. Published online August 12, 2019. doi:10.1001/jamainternmed.2019.3451

**eFigure.** Sample Construction

**eTable 1.** Incidence and Magnitude of Out-of-Network Billing for Commonly Seen Providers: Emergency Room Visits

**eTable 2.** Incidence and Magnitude of Out-of-Network Billing for Commonly Seen Providers: Inpatient Admissions

**eTable 3.** Sensitivity Analyses for Annual Incidence and Magnitude of Out-of-Network Billing: Emergency Room Visits

**eTable 4.** Sensitivity Analyses for Annual Incidence and Magnitude of Out-of-Network Billing: Inpatient Admissions

**eTable 5.** Incidence and Magnitude of Out-of-Network Billing: Surgical vs. Medical Inpatient Admissions

**eTable 6.** Out-of-Network Billing for Emergency Room Visits (Including Visits Where Network Status Was Unknown)

**eTable 7.** Out-of-Network Billing for Inpatient Admissions (Including Visits Where Network Status Was Unknown)

**eTable 8.** Incidence and Magnitude of Out-of-Network Billing for Commonly Seen Providers: Emergency Room Visits (Including Visits Where Network Status Was Unknown)

**eTable 9.** Incidence and Magnitude of Out-of-Network Billing for Commonly Seen Providers: Inpatient Admissions (Including Visits Where Network Status Was Unknown)

**eTable 10.** Annual Incidence and Magnitude of Out-of-Network Billing: Elective Inpatient Admissions

This supplementary material has been provided by the authors to give readers additional information about their work.

## eFigure. Sample Construction.

Initial Sample: All inpatient admissions and emergency room visits to an in-network hospital between January 1, 2010 and December 31, 2016.  
N=17,073,129 ER visits/6,454,236 inpatient admissions

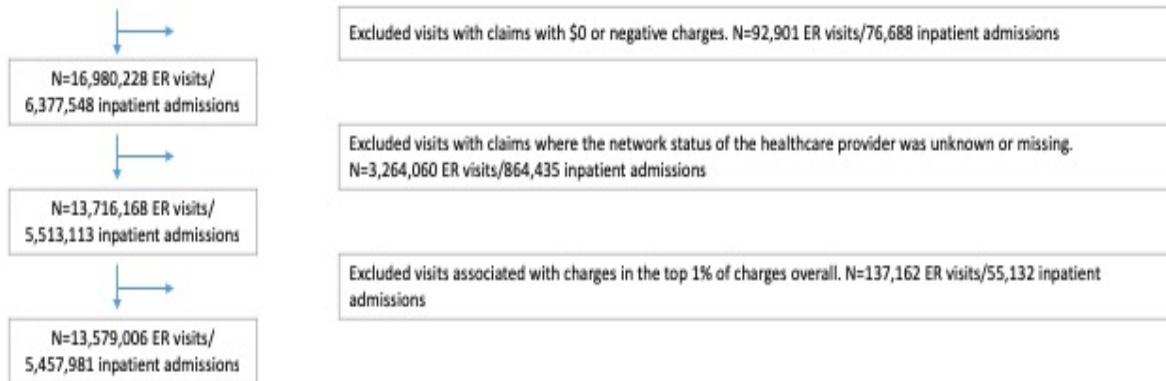

**eTable 1. Incidence and Magnitude of Out-of-Network Billing for Commonly Seen Providers: Emergency Room Visits**

|    | Specialty                            | Number of Visits <sup>a</sup> | Visits with Out-of-Network Bill <sup>b</sup> , N (%) | Potential Out-of-Network Responsibility <sup>c</sup> (\$) |                 |      |      |      |      |       |
|----|--------------------------------------|-------------------------------|------------------------------------------------------|-----------------------------------------------------------|-----------------|------|------|------|------|-------|
|    |                                      |                               |                                                      | Mean                                                      | SD <sup>d</sup> | 10th | 25th | 50th | 75th | 90th  |
| 1  | Emergency Medicine                   | 11,811,471                    | 3,853,305 (33)                                       | 396                                                       | 382             | 19   | 117  | 292  | 576  | 910   |
| 2  | Radiology                            | 7,286,182                     | 1,319,676 (18)                                       | 115                                                       | 203             | 11   | 20   | 49   | 150  | 294   |
| 3  | Ambulance                            | 1,661,978                     | 1,422,134 (86)                                       | 244                                                       | 801             | 0    | 0    | 25   | 296  | 704   |
| 4  | Cardiology                           | 1,537,176                     | 321,230 (21)                                         | 64                                                        | 344             | 7    | 15   | 25   | 58   | 96    |
| 5  | Internal Medicine                    | 1,387,236                     | 329,787 (24)                                         | 186                                                       | 308             | 0    | 23   | 103  | 237  | 452   |
| 6  | Family Practice                      | 1,026,329                     | 206,147 (20)                                         | 255                                                       | 359             | 0    | 32   | 132  | 347  | 682   |
| 7  | Unknown                              | 774,159                       | 149,746 (19)                                         | 284                                                       | 425             | 9    | 81   | 181  | 372  | 682   |
| 8  | Pediatrics                           | 221,995                       | 18,656 (8)                                           | 323                                                       | 394             | 0    | 23   | 178  | 565  | 761   |
| 9  | <b>General Surgery<sup>e</sup></b>   | 200,980                       | 26,650 (13)                                          | 676                                                       | 2,236           | 0    | 40   | 157  | 439  | 1,341 |
| 10 | Anesthesiology                       | 167,185                       | 38,196 (23)                                          | 568                                                       | 855             | 0    | 44   | 268  | 763  | 1,504 |
| 11 | Pathology                            | 164,711                       | 46,769 (28)                                          | 107                                                       | 221             | 3    | 21   | 55   | 118  | 226   |
| 12 | Gastroenterology                     | 108,735                       | 8,772 (8)                                            | 266                                                       | 864             | 0    | 22   | 83   | 229  | 615   |
| 13 | <b>Orthopedics</b>                   | 98,966                        | 12,587 (13)                                          | 1,004                                                     | 2,618           | 7    | 61   | 189  | 716  | 2,661 |
| 14 | Neurology                            | 92,838                        | 12,811 (14)                                          | 231                                                       | 877             | 0    | 21   | 97   | 225  | 423   |
| 15 | <b>Obstetrics and Gynecology</b>     | 86,628                        | 5,571 (6)                                            | 271                                                       | 1058            | 0    | 0    | 41   | 246  | 584   |
| 16 | Pulmonary Medicine                   | 82,139                        | 11,905 (14)                                          | 165                                                       | 306             | 0    | 23   | 89   | 184  | 378   |
| 17 | Psychiatry                           | 78,970                        | 22,255 (28)                                          | 162                                                       | 300             | 0    | 20   | 78   | 159  | 417   |
| 18 | Hematology and Oncology              | 63,557                        | 6,156 (10)                                           | 279                                                       | 1,223           | 0    | 41   | 107  | 231  | 454   |
| 19 | Nephrology                           | 60,009                        | 11,441 (19)                                          | 178                                                       | 534             | 0    | 32   | 106  | 179  | 389   |
| 20 | <b>Urology</b>                       | 58,514                        | 3,581 (6)                                            | 404                                                       | 1,146           | 0    | 34   | 118  | 301  | 880   |
| 21 | <b>Vascular Surgery</b>              | 46,958                        | 6,838 (15)                                           | 260                                                       | 1,486           | 10   | 23   | 53   | 133  | 377   |
| 22 | Infections Disease                   | 33,187                        | 6,001 (18)                                           | 153                                                       | 261             | 0    | 39   | 99   | 193  | 289   |
| 23 | <b>Ophthalmology</b>                 | 27,371                        | 2,825 (10)                                           | 336                                                       | 914             | 0    | 0    | 86   | 347  | 781   |
| 24 | <b>Otolaryngology</b>                | 25,303                        | 2,026 (8)                                            | 317                                                       | 1,557           | 0    | 17   | 78   | 235  | 575   |
| 25 | Physical Medicine and Rehabilitation | 20,064                        | 3,958 (20)                                           | 212                                                       | 942             | 0    | 27   | 61   | 169  | 475   |
| 26 | <b>Neurological Surgery</b>          | 19,423                        | 2,773 (14)                                           | 610                                                       | 2,838           | 0    | 48   | 142  | 339  | 808   |
| 27 | <b>Thoracic Surgery</b>              | 18,630                        | 3,304 (18)                                           | 220                                                       | 869             | 0    | 0    | 46   | 208  | 521   |
| 28 | Dermatology                          | 18,556                        | 2,206 (12)                                           | 217                                                       | 439             | 0    | 1    | 75   | 354  | 528   |
| 29 | Endocrinology                        | 15,222                        | 2,452 (16)                                           | 130                                                       | 439             | 0    | 17   | 45   | 127  | 267   |

|    |                                 |        |            |      |       |    |     |      |       |       |
|----|---------------------------------|--------|------------|------|-------|----|-----|------|-------|-------|
| 30 | Critical Care Medicine          | 11,194 | 1,022 (9)  | 372  | 530   | 0  | 63  | 224  | 455   | 834   |
| 31 | <b>Plastic Surgery</b>          | 10,240 | 4,106 (40) | 2649 | 4172  | 24 | 245 | 1304 | 3407  | 6,458 |
| 32 | <b>Therapeutic Radiology</b>    | 9,382  | 1,549 (17) | 199  | 496   | 23 | 30  | 56   | 202   | 370   |
| 33 | Rheumatology                    | 7,533  | 839 (11)   | 205  | 432   | 7  | 30  | 74   | 164   | 491   |
| 34 | <b>Colorectal Surgery</b>       | 7,371  | 934 (13)   | 298  | 1,198 | 0  | 0   | 4    | 113   | 576   |
| 35 | Allergy and Immunology          | 6,171  | 607 (10)   | 83   | 122   | 0  | 8   | 44   | 124   | 224   |
| 36 | <b>Obstetrics</b>               | 4,869  | 253 (5)    | 367  | 279   | 42 | 155 | 338  | 523   | 728   |
| 37 | Neonatology                     | 4,551  | 223 (5)    | 550  | 792   | 37 | 168 | 349  | 710   | 1,109 |
| 38 | Geriatric Medicine              | 1,951  | 188 (10)   | 280  | 244   | 14 | 96  | 261  | 356   | 533   |
| 39 | <b>Gynecology</b>               | 1,854  | 728 (39)   | 585  | 518   | 0  | 0   | 605  | 1,037 | 1,252 |
| 40 | Preventive Medicine             | 1,645  | 698 (42)   | 429  | 351   | 23 | 157 | 327  | 731   | 840   |
| 41 | Osteopathy                      | 1,514  | 1127 (74)  | 353  | 390   | 37 | 74  | 173  | 559   | 983   |
| 42 | Hospice and Palliative Medicine | 1,167  | 89 (8)     | 145  | 107   | 37 | 56  | 128  | 196   | 265   |
| 43 | <b>Gynecologic Oncology</b>     | 924    | 21 (2)     | 128  | 207   | 0  | 0   | 33   | 173   | 223   |
| 44 | Genetics                        | 496    | 23 (5)     | 255  | 570   | 63 | 66  | 125  | 232   | 276   |
| 45 | Podiatry                        | 227    | 8 (4)      | 117  | 231   | 0  | 0   | 41   | 84    | 682   |

<sup>a</sup>Total emergency room visits with at least one claim submitted by the given provider category/specialty

<sup>b</sup>Total emergency room visits with at least one out-of-network claim submitted by the given provider category/specialty

<sup>c</sup>Patient's responsibility for out-of-network services, defined as the difference between the provider's charge and the amount typically paid by the insurer for an in-network service. These amounts are in addition to any other out-of-pocket payments (e.g., payments for deductible and coinsurance). All dollar values are adjusted to 2018 dollars.

<sup>d</sup>Standard Deviation

<sup>e</sup>Bolded specialties are the specialties used to identify surgical admissions for subgroup analyses (i.e., eTable 5)

**eTable 2. Incidence and Magnitude of Out-of-Network Billing for Commonly Seen Providers: Inpatient Admissions**

|    | Specialty <sup>a</sup>               | Number of Admissions <sup>b</sup> | Admissions with Out-of-Network Bill <sup>c</sup> , N (%) | Potential Out-of-Network Responsibility <sup>d</sup> (\$) |                 |      |      |      |       |        |
|----|--------------------------------------|-----------------------------------|----------------------------------------------------------|-----------------------------------------------------------|-----------------|------|------|------|-------|--------|
|    |                                      |                                   |                                                          | Mean                                                      | SD <sup>e</sup> | 10th | 25th | 50th | 75th  | 90th   |
| 1  | Radiology                            | 3,181,749                         | 720,698 (23)                                             | 267                                                       | 759             | 15   | 33   | 121  | 307   | 615    |
| 2  | Emergency Medicine                   | 2,132,940                         | 908,430 (43)                                             | 595                                                       | 575             | 44   | 203  | 477  | 858   | 1,267  |
| 3  | Internal Medicine                    | 2,00,7554                         | 507,014 (25)                                             | 450                                                       | 1,133           | 9    | 65   | 206  | 483   | 999    |
| 4  | Anesthesiology                       | 1,961,192                         | 378,239 (19)                                             | 1,369                                                     | 1,807           | 0    | 233  | 794  | 1,825 | 3,362  |
| 5  | Cardiology                           | 1,701,819                         | 333,769 (20)                                             | 328                                                       | 1,438           | 10   | 19   | 52   | 196   | 612    |
| 6  | Unknown                              | 1,115,844                         | 214,992 (19)                                             | 544                                                       | 1,489           | 29   | 106  | 265  | 614   | 1,136  |
| 7  | Pathology                            | 987,225                           | 219,335 (22)                                             | 297                                                       | 542             | 16   | 63   | 145  | 303   | 676    |
| 8  | Ambulance Providers                  | 947,744                           | 773,218 (82)                                             | 424                                                       | 2,176           | 0    | 0    | 44   | 365   | 832    |
| 9  | Family Practice                      | 783,703                           | 142,455 (18)                                             | 384                                                       | 1,330           | 0    | 49   | 148  | 364   | 798    |
| 10 | Obstetrics & Gynecology              | 760,049                           | 6,220 (1)                                                | 1,228                                                     | 3,457           | 18   | 91   | 293  | 1,075 | 2,803  |
| 11 | General Surgery                      | 586,860                           | 75,956 (13)                                              | 2,454                                                     | 6,953           | 26   | 133  | 583  | 2,317 | 5,540  |
| 12 | Orthopedics                          | 522,857                           | 52,109 (10)                                              | 5,043                                                     | 10,241          | 85   | 470  | 2230 | 5,314 | 11,139 |
| 13 | Pulmonary Medicine                   | 495,637                           | 72,948 (15)                                              | 452                                                       | 1,242           | 0    | 54   | 183  | 458   | 1,012  |
| 14 | Gastroenterology                     | 414,692                           | 39,199 (9)                                               | 695                                                       | 1,613           | 9    | 73   | 264  | 734   | 1,568  |
| 15 | Neurology                            | 349,216                           | 58,584 (17)                                              | 1,147                                                     | 3,518           | 0    | 74   | 239  | 840   | 2,751  |
| 16 | Pediatrics                           | 318,516                           | 5,782 (2)                                                | 294                                                       | 676             | 6    | 49   | 126  | 285   | 665    |
| 17 | Nephrology                           | 306,740                           | 43,945 (14)                                              | 326                                                       | 704             | 0    | 46   | 155  | 378   | 766    |
| 18 | Infectious Diseases                  | 303,756                           | 50,863 (17)                                              | 397                                                       | 743             | 11   | 78   | 205  | 442   | 863    |
| 19 | Hematology & Oncology                | 293,468                           | 22,355 (8)                                               | 643                                                       | 2,754           | 21   | 71   | 179  | 420   | 1,031  |
| 20 | Psychiatry                           | 206,442                           | 41,160 (20)                                              | 288                                                       | 820             | 0    | 51   | 139  | 306   | 629    |
| 21 | Urology                              | 187,587                           | 12,793 (7)                                               | 1,122                                                     | 3,682           | 7    | 57   | 198  | 768   | 2,583  |
| 22 | Vascular Surgery                     | 159,491                           | 20,785 (13)                                              | 1,443                                                     | 4,896           | 14   | 46   | 131  | 661   | 3,437  |
| 23 | Neurological Surgery                 | 150,963                           | 15,376 (10)                                              | 6,886                                                     | 16,561          | 21   | 130  | 609  | 5814  | 19,650 |
| 24 | Thoracic Surgery                     | 123,712                           | 12,966 (10)                                              | 3,770                                                     | 8,420           | 23   | 142  | 940  | 4,304 | 9,786  |
| 25 | Neonatology                          | 115,257                           | 1,253 (1)                                                | 1,160                                                     | 2,889           | 102  | 157  | 297  | 909   | 2,716  |
| 26 | Physical Medicine And Rehabilitation | 101,057                           | 16,972 (17)                                              | 634                                                       | 1,833           | 17   | 64   | 158  | 401   | 1,541  |
| 27 | Endocrinology                        | 68,420                            | 9,734 (14)                                               | 441                                                       | 2,620           | 7    | 42   | 109  | 274   | 589    |
| 28 | Otolaryngology                       | 57,770                            | 4,208 (7)                                                | 1,346                                                     | 5,379           | 3    | 53   | 194  | 686   | 2,630  |
| 29 | Obstetrics                           | 46,220                            | 49 (0)                                                   | 774                                                       | 1,164           | 82   | 157  | 314  | 769   | 2,079  |
| 30 | Critical Care Medicine               | 46,136                            | 211 (0)                                                  | 602                                                       | 907             | 39   | 129  | 379  | 563   | 1,453  |

|    |                                    |        |            |       |        |     |     |     |       |        |
|----|------------------------------------|--------|------------|-------|--------|-----|-----|-----|-------|--------|
| 31 | Colorectal Surgery                 | 39,987 | 2,354 (6)  | 2,309 | 5,677  | 8   | 94  | 457 | 1,866 | 5,660  |
| 32 | Plastic and Reconstructive Surgery | 29,539 | 3,140 (11) | 5,847 | 14,290 | 7   | 125 | 761 | 4,536 | 15,582 |
| 33 | Therapeutic Radiology              | 18,116 | 1,438 (8)  | 410   | 958    | 30  | 37  | 161 | 370   | 908    |
| 34 | Rheumatology                       | 16,985 | 1,748 (10) | 313   | 1,336  | 0   | 30  | 116 | 262   | 576    |
| 35 | Ophthalmology                      | 14,374 | 1,259 (9)  | 581   | 2,418  | 0   | 39  | 123 | 320   | 1,099  |
| 36 | Gynecologic Oncology               | 13,029 | 10 (0)     | 327   | 319    | 63  | 198 | 209 | 304   | 861    |
| 37 | Dermatology                        | 9,276  | 1,216 (13) | 330   | 1,362  | 0   | 20  | 106 | 306   | 627    |
| 38 | Gynecology                         | 8,762  | 153 (2)    | 621   | 1,004  | 57  | 115 | 229 | 566   | 2,032  |
| 39 | Allergy & Immunology               | 5,629  | 699 (12)   | 180   | 491    | 0   | 18  | 84  | 179   | 372    |
| 40 | Hospice & Palliative Medicine      | 4,736  | 19 (0)     | 202   | 211    | 59  | 69  | 135 | 264   | 492    |
| 41 | Geriatric Medicine                 | 4,165  | 55 (1)     | 291   | 154    | 10  | 210 | 329 | 336   | 362    |
| 42 | Genetics                           | 2,272  | 12 (1)     | 238   | 219    | 13  | 69  | 201 | 337   | 629    |
| 43 | Preventive Medicine                | 1,680  | 7 (0)      | 161   | 119    | 0   | 75  | 155 | 204   | 385    |
| 44 | Podiatry                           | 970    | 39 (4)     | 627   | 860    | 14  | 55  | 191 | 1,173 | 1,792  |
| 45 | Osteopathy                         | 405    | 5 (1)      | 882   | 10     | 877 | 877 | 877 | 877   | 900    |

<sup>a</sup>Specialties in bold are the specialties that were considered surgical specialties for the purposes of differentiating between medical and surgical admissions.

<sup>b</sup>Total inpatient admissions with at least one claim submitted by the given provider category/specialty

<sup>c</sup>Total inpatient admissions with at least one out-of-network claim submitted by the given provider category/specialty

<sup>d</sup>Patient's responsibility for out-of-network services, defined as the difference between the provider's charge and the amount typically paid by the insurer for an in-network service. These amounts are in addition to any other out-of-pocket payments (e.g., payments for deductible and coinsurance). All dollar values are adjusted to 2018 dollars.

<sup>e</sup>Standard Deviation

**eTable 3. Incidence and Magnitude of Out-of-Network Billing: Surgical vs. Medical Inpatient Admissions<sup>a</sup>**

|          | Number of Admissions <sup>a</sup> | Number of Admissions With Out-of-Network Claim <sup>b</sup> , N (%) | Potential Out-of-Network Responsibility <sup>c</sup> (\$) |      |      |      |       |       |
|----------|-----------------------------------|---------------------------------------------------------------------|-----------------------------------------------------------|------|------|------|-------|-------|
|          |                                   |                                                                     | Mean (SD)                                                 | 10th | 25th | 50th | 75th  | 90th  |
| Surgical | 2,440,878                         | 753,564 (31)                                                        | 2,406 (6,108)                                             | 19   | 255  | 918  | 2,339 | 5,229 |
| Medical  | 3,017,103                         | 1,266,358 (42)                                                      | 914 (1,962))                                              | 0    | 137  | 506  | 1,112 | 1,978 |
| Overall  | 5,457,981                         | 2,019,922 (37)                                                      | 1,574 (4,382)                                             | 8    | 183  | 667  | 1,538 | 3,215 |

<sup>a</sup>Surgical admissions were defined as admissions at least one claim that was submitted by a provider from a surgical specialty (one of the 15 bolded specialties in **eTable 1**); all other admissions were classified as medical admissions

<sup>b</sup>Total annual admissions to an in-network hospital

<sup>c</sup>Number of admissions to an in-network hospital with at least one claim submitted by an out-of-network provider. <sup>d</sup>Patient's responsibility for out-of-network services, defined as the difference between the provider's charge and the amount typically paid by the insurer for an in-network service. These amounts are in addition to any other out-of-pocket payments (e.g., payments for deductible and coinsurance). All dollar values are adjusted to 2018 dollars.

**eTable 4. Sensitivity Analyses for Annual Incidence and Magnitude of Out-of-Network Billing: Emergency Room Visits**

|                                                                                                                                 | Potential Out-of-Network Responsibility <sup>a</sup> (\$) |      |      |      |      |       |
|---------------------------------------------------------------------------------------------------------------------------------|-----------------------------------------------------------|------|------|------|------|-------|
|                                                                                                                                 | Mean (SD)                                                 | 10th | 25th | 50th | 75th | 90th  |
| <i>Sensitivity Analysis: Exclude Cases with Estimated Negative Responsibility</i>                                               |                                                           |      |      |      |      |       |
| 2010                                                                                                                            | 289 (460)                                                 | 25   | 73   | 183  | 376  | 661   |
| 2011                                                                                                                            | 330 (516)                                                 | 30   | 86   | 213  | 432  | 751   |
| 2012                                                                                                                            | 382 (601)                                                 | 34   | 105  | 250  | 508  | 859   |
| 2013                                                                                                                            | 469 (672)                                                 | 49   | 140  | 323  | 635  | 1,039 |
| 2014                                                                                                                            | 528 (753)                                                 | 63   | 171  | 375  | 710  | 1,139 |
| 2015                                                                                                                            | 606 (826)                                                 | 80   | 210  | 462  | 814  | 1,289 |
| 2016                                                                                                                            | 676 (879)                                                 | 90   | 245  | 524  | 922  | 1,404 |
| <i>Sensitivity Analysis: Assign the Average Annual Financial Responsibility to Cases with Estimated Negative Responsibility</i> |                                                           |      |      |      |      |       |
| 2010                                                                                                                            | 289 (401)                                                 | 34   | 103  | 288  | 301  | 574   |
| 2011                                                                                                                            | 329 (466)                                                 | 38   | 114  | 290  | 361  | 683   |
| 2012                                                                                                                            | 382 (555)                                                 | 41   | 123  | 325  | 448  | 795   |
| 2013                                                                                                                            | 469 (635)                                                 | 57   | 158  | 383  | 581  | 1,001 |
| 2014                                                                                                                            | 528 (716)                                                 | 69   | 185  | 434  | 658  | 1,108 |
| 2015                                                                                                                            | 606 (793)                                                 | 87   | 229  | 506  | 774  | 1,272 |
| 2016                                                                                                                            | 676 (847)                                                 | 97   | 265  | 574  | 891  | 1,364 |

<sup>a</sup>Patient's responsibility for out-of-network services, defined as the difference between the provider's charge and the amount typically paid by the insurer for an in-network service. These amounts are in addition to any other out-of-pocket payments (e.g., payments for deductible and coinsurance). All dollar values are adjusted to 2018 dollars.



**eTable 5. Sensitivity Analyses for Annual Incidence and Magnitude of Out-of-Network Billing: Inpatient Admissions**

|                                                                                                                                 | Potential Out-of-Network Responsibility <sup>a</sup> (\$) |      |      |       |       |       |
|---------------------------------------------------------------------------------------------------------------------------------|-----------------------------------------------------------|------|------|-------|-------|-------|
|                                                                                                                                 | Mean (SD)                                                 | 10th | 25th | 50th  | 75th  | 90th  |
| <i>Sensitivity Analysis: Exclude Cases with Estimated Negative Responsibility</i>                                               |                                                           |      |      |       |       |       |
| 2010                                                                                                                            | 1,000 (2,704)                                             | 46   | 158  | 436   | 954   | 1,998 |
| 2011                                                                                                                            | 1,159 (3,080)                                             | 56   | 194  | 524   | 1,116 | 2,328 |
| 2012                                                                                                                            | 1,437 (4,110)                                             | 71   | 232  | 630   | 1,327 | 2,814 |
| 2013                                                                                                                            | 1,620 (4,351)                                             | 93   | 286  | 747   | 1,538 | 3,160 |
| 2014                                                                                                                            | 1,871 (4,858)                                             | 115  | 341  | 864   | 1,800 | 3,675 |
| 2015                                                                                                                            | 2,065 (5,320)                                             | 134  | 389  | 957   | 1,959 | 3,999 |
| 2016                                                                                                                            | 2,178 (5,103)                                             | 141  | 435  | 1,088 | 2,196 | 4,298 |
| <i>Sensitivity Analysis: Assign the Average Annual Financial Responsibility to Cases with Estimated Negative Responsibility</i> |                                                           |      |      |       |       |       |
| 2010                                                                                                                            | 1,000 (2,424)                                             | 61   | 214  | 643   | 1,000 | 1,684 |
| 2011                                                                                                                            | 1,159 (2,846)                                             | 69   | 238  | 683   | 1,159 | 2,059 |
| 2012                                                                                                                            | 1,437 (3,872)                                             | 83   | 274  | 756   | 1,437 | 2,569 |
| 2013                                                                                                                            | 1,619 (4,163)                                             | 104  | 322  | 856   | 1,619 | 2,953 |
| 2014                                                                                                                            | 1,871 (4,672)                                             | 126  | 377  | 975   | 1,871 | 3,474 |
| 2015                                                                                                                            | 2,065 (5,130)                                             | 146  | 430  | 1,071 | 2,065 | 3,791 |
| 2016                                                                                                                            | 2,177 (4,940)                                             | 149  | 472  | 1,199 | 2,178 | 4,112 |

<sup>a</sup>Patient’s responsibility for out-of-network services, defined as the difference between the provider’s charge and the amount typically paid by the insurer for an in-network service. These amounts are in addition to any other out-of-pocket payments (e.g., payments for deductible and coinsurance). All dollar values are adjusted to 2018 dollars.

**eTable 6. Out-of-Network Billing for Emergency Room Visits (including visits where network status was unknown)**

|         | Number of Visits <sup>a</sup> | Visits with at least one claim with unknown network status <sup>b</sup> , N(%) | Visits With Out-of-Network Bill <sup>b</sup> , N (%) | Potential Out-of-Network Responsibility <sup>c</sup> (\$) |      |      |      |      |       |
|---------|-------------------------------|--------------------------------------------------------------------------------|------------------------------------------------------|-----------------------------------------------------------|------|------|------|------|-------|
|         |                               |                                                                                |                                                      | Mean (SD <sup>d</sup> )                                   | 10th | 25th | 50th | 75th | 90th  |
| 2010    | 1,969,413                     | 511,122 (26)                                                                   | 516,820 (26)                                         | 245 (968)                                                 | 0    | 8    | 117  | 321  | 611   |
| 2011    | 2,163,069                     | 506,200 (23)                                                                   | 634,033 (29)                                         | 294 (736)                                                 | 0    | 27   | 164  | 392  | 716   |
| 2012    | 2,332,076                     | 498,169 (21)                                                                   | 738,929 (32)                                         | 346 (777)                                                 | 0    | 47   | 203  | 473  | 829   |
| 2013    | 2,389,672                     | 466,467 (20)                                                                   | 816,186 (34)                                         | 441 (1,113)                                               | 0    | 89   | 282  | 604  | 1,027 |
| 2014    | 2,315,571                     | 406,014 (18)                                                                   | 830,572 (36)                                         | 504 (1,291)                                               | 8    | 123  | 334  | 680  | 1,134 |
| 2015    | 2,599,246                     | 452,495 (17)                                                                   | 893,711 (34)                                         | 589 (1,766)                                               | 18   | 160  | 422  | 790  | 1,287 |
| 2016    | 3,074,019                     | 423,593 (14)                                                                   | 1,171,380 (38)                                       | 653 (1,986)                                               | 24   | 186  | 489  | 906  | 1,390 |
| Overall | 16,843,066                    | 3,264,060 (19)                                                                 | 5,601,631 (33)                                       | 413 (1,413)                                               | 0    | 84   | 297  | 648  | 1,093 |

<sup>a</sup>Total annual emergency room visits to an in-network hospital

<sup>b</sup>Visits where at least one claim was submitted by a provider whose network status was unknown

<sup>c</sup>Number of visits to an in-network emergency room with at least one claim submitted by an out-of-network provider. <sup>c</sup>Patient's responsibility for out-of-network services, defined as the difference between the provider's charge and the amount typically paid by the insurer for an in-network service. These amounts are in addition to any other out-of-pocket payments (e.g., payments for deductible and coinsurance). All dollar values are adjusted to 2018 dollars.

<sup>d</sup>Standard deviation

**eTable 7. Out-of-Network Billing for Inpatient Admissions (including visits where network status was unknown)**

|         | Number of Visits <sup>a</sup> | Visits with at least one claim with unknown network status <sup>b</sup> , N(%) | Visits With Out-of-Network Bill <sup>b</sup> , N (%) | Potential Out-of-Network Responsibility <sup>c</sup> (\$) |      |      |      |       |       |
|---------|-------------------------------|--------------------------------------------------------------------------------|------------------------------------------------------|-----------------------------------------------------------|------|------|------|-------|-------|
|         |                               |                                                                                |                                                      | Mean (SD <sup>d</sup> )                                   | 10th | 25th | 50th | 75th  | 90th  |
| 2010    | 721,332                       | 114,172 (16)                                                                   | 159,965 (22)                                         | 807 (2,486)                                               | 0    | 30   | 286  | 795   | 1,689 |
| 2011    | 682,218                       | 108,761 (16)                                                                   | 175,828 (26)                                         | 991 (2,878)                                               | 0    | 73   | 390  | 972   | 2,064 |
| 2012    | 968,958                       | 138,134 (14)                                                                   | 301,817 (31)                                         | 1,278 (3,903)                                             | 0    | 125  | 508  | 1,195 | 2,572 |
| 2013    | 999,430                       | 131,907 (13)                                                                   | 338,938 (34)                                         | 1,483 (4,190)                                             | 16   | 192  | 653  | 1,428 | 2,956 |
| 2014    | 917,511                       | 114,086 (12)                                                                   | 327,681 (36)                                         | 1,731 (4,698)                                             | 25   | 245  | 761  | 1,682 | 3,474 |
| 2015    | 955,053                       | 126,572 (13)                                                                   | 319,365 (33)                                         | 1,920 (5,157)                                             | 35   | 291  | 853  | 1,842 | 3,791 |
| 2016    | 1,077,914                     | 130,803 (12)                                                                   | 397,502 (37)                                         | 2,041 (4,986)                                             | 44   | 324  | 984  | 2,083 | 4,112 |
| Overall | 6,322,416                     | 864,435 (14)                                                                   | 2,021,096 (32)                                       | 1,575 (4,388)                                             | 8    | 183  | 667  | 1,538 | 3,216 |

<sup>a</sup>Total annual inpatient admissions to an in-network hospital

<sup>b</sup>Visits where at least one claim was submitted by a provider whose network status was unknown

<sup>c</sup>Number of visits to an in-network emergency room with at least one claim submitted by an out-of-network provider. <sup>c</sup>Patient's responsibility for out-of-network services, defined as the difference between the provider's charge and the amount typically paid by the insurer for an in-network service. These amounts are in addition to any other out-of-pocket payments (e.g., payments for deductible and coinsurance). All dollar values are adjusted to 2018 dollars.

<sup>d</sup>Standard deviation

**eTable 8. Incidence and Magnitude of Out-of-Network Billing for Commonly Seen Providers: Emergency Room Visits (including visits where network status was unknown)**

|    | Specialty                           | Number of Visits <sup>a</sup> | Visits with at least one claim with unknown network status <sup>b</sup> , N(%) | Visits with Out-of-Network Bill <sup>c</sup> , N (%) | Potential Out-of-Network Responsibility <sup>d</sup> (\$) |                 |      |      |      |      |      |
|----|-------------------------------------|-------------------------------|--------------------------------------------------------------------------------|------------------------------------------------------|-----------------------------------------------------------|-----------------|------|------|------|------|------|
|    |                                     |                               |                                                                                |                                                      | Mean                                                      | SD <sup>e</sup> | 10th | 25th | 50th | 75th | 90th |
| 1  | Emergency Medicine                  | 14,662,016                    | 2,116,680 (14)                                                                 | 3,963,829 (27)                                       | 396                                                       | 382             | 19   | 118  | 292  | 576  | 909  |
| 2  | Radiology                           | 8,919,915                     | 2,203,66 (2)                                                                   | 1,411,397 (16)                                       | 116                                                       | 204             | 12   | 20   | 50   | 152  | 296  |
| 3  | Ambulance                           | 2,388,120                     | 697,790 (29)                                                                   | 1,441,741 (60)                                       | 243                                                       | 800             | 0    | 0    | 25   | 296  | 702  |
| 4  | Cardiology                          | 1,858,467                     | 53,887 (3)                                                                     | 349,303 (19)                                         | 64                                                        | 400             | 7    | 15   | 26   | 62   | 93   |
| 5  | Internal Medicine                   | 1,668,820                     | 96,153 (6)                                                                     | 351,878 (21)                                         | 186                                                       | 309             | 0    | 23   | 102  | 237  | 451  |
| 6  | Family Practice                     | 1,316,520                     | 151,287 (11)                                                                   | 217,070 (16)                                         | 256                                                       | 359             | 0    | 32   | 132  | 348  | 686  |
| 7  | Unknown                             | 1,024,528                     | 140,513 (14)                                                                   | 159,010 (16)                                         | 285                                                       | 448             | 11   | 82   | 184  | 373  | 682  |
| 8  | Pathology                           | 295,112                       | 77,829 (26)                                                                    | 55,610 (19)                                          | 106                                                       | 213             | 5    | 23   | 56   | 120  | 221  |
| 9  | Pediatrics                          | 281,774                       | 24,830 (9)                                                                     | 20,387 (7)                                           | 325                                                       | 397             | 0    | 25   | 182  | 565  | 767  |
| 10 | General Surgery                     | 278,420                       | 21,257 (7)                                                                     | 30,189 (11)                                          | 782                                                       | 2744            | 0    | 43   | 167  | 467  | 1519 |
| 11 | Anesthesiology                      | 230,959                       | 14,006 (6)                                                                     | 42,813 (19)                                          | 581                                                       | 879             | 0    | 44   | 278  | 778  | 1530 |
| 12 | Gastroenterology                    | 135,149                       | 1,783 (1)                                                                      | 9,241 (7)                                            | 264                                                       | 847             | 0    | 23   | 83   | 229  | 607  |
| 13 | Orthopedics                         | 128,919                       | 5,474 (4)                                                                      | 13,331 (10)                                          | 1037                                                      | 2681            | 8    | 62   | 197  | 763  | 2752 |
| 14 | Neurology                           | 115,568                       | 2,314 (2)                                                                      | 13,506 (12)                                          | 236                                                       | 884             | 0    | 22   | 98   | 226  | 425  |
| 15 | Psychiatry                          | 111,125                       | 14,471 (13)                                                                    | 24,950 (22)                                          | 159                                                       | 302             | 0    | 18   | 78   | 157  | 394  |
| 16 | Obstetrics and Gynecology           | 109,805                       | 3,948 (4)                                                                      | 6,057 (6)                                            | 269                                                       | 1045            | 0    | 0    | 40   | 243  | 584  |
| 17 | Pulmonary Medicine                  | 99,676                        | 2,002 (2)                                                                      | 12,612 (13)                                          | 166                                                       | 306             | 0    | 23   | 89   | 188  | 381  |
| 18 | Hematology and Oncology             | 75,531                        | 1,607 (2)                                                                      | 6,383 (8)                                            | 279                                                       | 1213            | 0    | 40   | 107  | 229  | 451  |
| 19 | Urology                             | 71,994                        | 890 (1)                                                                        | 3,780 (5)                                            | 410                                                       | 1163            | 0    | 33   | 118  | 302  | 888  |
| 20 | Nephrology                          | 71,916                        | 2,370 (3)                                                                      | 11,909 (17)                                          | 178                                                       | 526             | 0    | 31   | 106  | 179  | 394  |
| 21 | Vascular Surgery                    | 58,735                        | 958 (2)                                                                        | 7,144 (12)                                           | 278                                                       | 1519            | 9    | 23   | 54   | 139  | 388  |
| 22 | Infections Disease                  | 42,564                        | 2,456 (6)                                                                      | 6,557 (15)                                           | 157                                                       | 262             | 0    | 39   | 102  | 199  | 299  |
| 23 | Ophthalmology                       | 32,699                        | 1,348 (4)                                                                      | 3,093 (9)                                            | 330                                                       | 879             | 0    | 5    | 101  | 338  | 749  |
| 24 | Otolaryngology                      | 32,078                        | 840 (3)                                                                        | 2,219 (7)                                            | 346                                                       | 1815            | 0    | 17   | 85   | 242  | 575  |
| 25 | Neurological Surgery                | 26,740                        | 1,588 (6)                                                                      | 3,102 (12)                                           | 694                                                       | 3076            | 0    | 52   | 144  | 364  | 823  |
| 26 | Thoracic Surgery                    | 26,608                        | 2,708 (10)                                                                     | 3,689 (14)                                           | 255                                                       | 1089            | 0    | 0    | 54   | 213  | 521  |
| 27 | Physician Medicine & Rehabilitation | 24,386                        | 1,357 (6)                                                                      | 4,073 (17)                                           | 217                                                       | 937             | 0    | 27   | 62   | 169  | 485  |
| 28 | Dermatology                         | 22,843                        | 1,542 (7)                                                                      | 2,357 (10)                                           | 210                                                       | 427             | 0    | 10   | 71   | 313  | 528  |

|    |                                 |        |            |            |      |      |    |     |      |      |      |
|----|---------------------------------|--------|------------|------------|------|------|----|-----|------|------|------|
| 29 | Plastic Surgery                 | 20,509 | 7,535 (37) | 4,816 (23) | 2637 | 4262 | 24 | 258 | 1300 | 3374 | 6386 |
| 30 | Critical Care Medicine          | 19,496 | 1,995 (10) | 1,482 (8)  | 386  | 540  | 0  | 69  | 223  | 468  | 930  |
| 31 | Endocrinology                   | 19,231 | 730 (4)    | 3,011 (16) | 152  | 442  | 0  | 19  | 57   | 150  | 303  |
| 32 | Therapeutic Radiology           | 11,938 | 433 (4)    | 1,684 (14) | 196  | 484  | 22 | 30  | 55   | 201  | 367  |
| 33 | Rheumatology                    | 9,741  | 912 (9)    | 883 (9)    | 210  | 434  | 7  | 29  | 74   | 168  | 496  |
| 34 | Colorectal Surgery              | 9,283  | 163 (2)    | 979 (11)   | 382  | 1431 | 0  | 0   | 4    | 147  | 667  |
| 35 | Allergy and Immunology          | 8,098  | 235 (3)    | 658 (8)    | 88   | 124  | 0  | 9   | 44   | 127  | 248  |
| 36 | Obstetrics                      | 6,178  | 333 (5)    | 286 (5)    | 385  | 372  | 42 | 144 | 321  | 562  | 757  |
| 37 | Neonatology                     | 5,883  | 339 (6)    | 291 (5)    | 602  | 769  | 43 | 180 | 413  | 761  | 1140 |
| 38 | Geriatric Medicine              | 4,107  | 1,359 (33) | 281 (7)    | 262  | 266  | 6  | 41  | 227  | 350  | 582  |
| 39 | Preventive Medicine             | 3,189  | 1,293 (41) | 780 (24)   | 416  | 346  | 18 | 132 | 327  | 720  | 830  |
| 40 | Hospice and Palliative Medicine | 2,909  | 1,002 (34) | 351 (12)   | 89   | 110  | 37 | 42  | 50   | 91   | 196  |
| 41 | Osteopathy                      | 2,873  | 1,140 (40) | 1,257 (44) | 350  | 388  | 37 | 74  | 173  | 536  | 983  |
| 42 | Gynecology                      | 2,436  | 141 (6)    | 739 (30)   | 582  | 522  | 0  | 0   | 601  | 1036 | 1252 |
| 43 | Gynecologic Oncology            | 1,345  | 38 (3)     | 31 (2)     | 1005 | 3572 | 0  | 21  | 130  | 223  | 672  |
| 44 | Genetics                        | 601    | 30 (5)     | 29 (5)     | 231  | 513  | 13 | 63  | 108  | 232  | 307  |
| 45 | Podiatry                        | 257    | 0 (0)      | 8 (3)      | 117  | 231  | 0  | 0   | 41   | 84   | 682  |

<sup>a</sup>Total emergency room visits with at least one claim submitted by the given provider category/specialty

<sup>b</sup>Visits where at least one claim was submitted by a provider whose network status was unknown. Providers with unknown network status were counted as being “in-network” for the purposes of analyzing the incidence and financial liability associated with out-of-network billing.

<sup>c</sup>Total emergency room visits with at least one out-of-network claim submitted by the given provider category/specialty

<sup>c</sup>Patient’s responsibility for out-of-network services, defined as the difference between the provider’s charge and the amount typically paid by the insurer for an in-network service. These amounts are in addition to any other out-of-pocket payments (e.g., payments for deductible and coinsurance). All dollar values are adjusted to 2018 dollars.

<sup>d</sup>Standard Deviation

**eTable 9. Incidence and Magnitude of Out-of-Network Billing for Commonly Seen Providers: Inpatient Admissions (including visits where network status was unknown)**

|    | Specialty                            | Number of Admissions <sup>a</sup> | Visits with at least one claim with unknown network status <sup>b</sup> , N(%) | Admissions with Out-of-Network Bill <sup>c</sup> , N (%) | Potential Out-of-Network Responsibility <sup>d</sup> (\$) |                 |      |      |       |       |        |
|----|--------------------------------------|-----------------------------------|--------------------------------------------------------------------------------|----------------------------------------------------------|-----------------------------------------------------------|-----------------|------|------|-------|-------|--------|
|    |                                      |                                   |                                                                                |                                                          | Mean                                                      | SD <sup>e</sup> | 10th | 25th | 50th  | 75th  | 90th   |
| 1  | Radiology                            | 3,720,098                         | 77,213 (2)                                                                     | 720,896 (19)                                             | 267                                                       | 759             | 15   | 33   | 121   | 307   | 615    |
| 2  | Emergency Medicine                   | 2,582,000                         | 218,058 (8)                                                                    | 908,459 (35)                                             | 595                                                       | 575             | 44   | 203  | 477   | 858   | 1,267  |
| 3  | Internal Medicine                    | 2,322,323                         | 79,472 (3)                                                                     | 507,051 (22)                                             | 450                                                       | 1,133           | 9    | 65   | 206   | 483   | 999    |
| 4  | Anesthesiology                       | 2,320,273                         | 114,988 (5)                                                                    | 378,263 (16)                                             | 1,369                                                     | 1,807           | 0    | 233  | 794   | 1,825 | 3,362  |
| 5  | Cardiology                           | 1,980,835                         | 41,201 (2)                                                                     | 333,819 (17)                                             | 328                                                       | 1,438           | 10   | 19   | 52    | 196   | 612    |
| 6  | Unknown                              | 1,358,874                         | 83,590 (6)                                                                     | 215,039 (16)                                             | 544                                                       | 1,489           | 29   | 106  | 265   | 614   | 1,136  |
| 7  | Pathology                            | 1,236,616                         | 101,393 (8)                                                                    | 219,436 (18)                                             | 297                                                       | 542             | 16   | 63   | 145   | 303   | 676    |
| 8  | Ambulance Providers                  | 1,186,611                         | 220,565 (19)                                                                   | 773,242 (65)                                             | 424                                                       | 2,176           | 0    | 0    | 44    | 365   | 832    |
| 9  | Family Practice                      | 906,991                           | 29,513 (3)                                                                     | 142,522 (16)                                             | 384                                                       | 1,329           | 0    | 49   | 148   | 364   | 798    |
| 10 | Obstetrics & Gynecology              | 867,537                           | 17,606 (2)                                                                     | 6,364 (0)                                                | 1,210                                                     | 3,423           | 19   | 92   | 292   | 1034  | 2,763  |
| 11 | General Surgery                      | 732,764                           | 32,853 (4)                                                                     | 75,981 (10)                                              | 2,454                                                     | 6,952           | 26   | 133  | 583   | 2,317 | 5,540  |
| 12 | Orthopedics                          | 610,864                           | 18,616 (3)                                                                     | 52,114 (9)                                               | 5,043                                                     | 10,241          | 85   | 470  | 2,230 | 5,314 | 11,139 |
| 13 | Pulmonary Medicine                   | 588,123                           | 8,379 (1)                                                                      | 72,951 (12)                                              | 452                                                       | 1,242           | 0    | 54   | 183   | 459   | 1,012  |
| 14 | Gastroenterology                     | 499,758                           | 5,068 (1)                                                                      | 39,202 (8)                                               | 695                                                       | 1,613           | 9    | 73   | 264   | 734   | 1,567  |
| 15 | Neurology                            | 434,579                           | 21,283 (5)                                                                     | 58,590 (13)                                              | 1,147                                                     | 3,518           | 0    | 74   | 239   | 840   | 2,750  |
| 16 | Infectious Diseases                  | 373,852                           | 14,566 (4)                                                                     | 50,867 (14)                                              | 397                                                       | 743             | 11   | 78   | 205   | 442   | 863    |
| 17 | Pediatrics                           | 369,637                           | 12,867 (3)                                                                     | 6,199 (2)                                                | 306                                                       | 816             | 7    | 50   | 127   | 283   | 665    |
| 18 | Nephrology                           | 357,389                           | 4,292 (1)                                                                      | 43,949 (12)                                              | 325                                                       | 704             | 0    | 46   | 155   | 378   | 766    |
| 19 | Hematology & Oncology                | 345,622                           | 3,642 (1)                                                                      | 22,366 (6)                                               | 643                                                       | 2,753           | 21   | 71   | 179   | 420   | 1,032  |
| 20 | Psychiatry                           | 268,929                           | 22,320 (8)                                                                     | 41,163 (15)                                              | 288                                                       | 821             | 0    | 51   | 139   | 307   | 629    |
| 21 | Urology                              | 217,008                           | 2,635 (1)                                                                      | 12,799 (6)                                               | 1,122                                                     | 3,681           | 7    | 57   | 198   | 769   | 2,584  |
| 22 | Neurological Surgery                 | 194,922                           | 8,413 (4)                                                                      | 15,379 (8)                                               | 6,885                                                     | 16,560          | 21   | 130  | 608   | 5813  | 19,650 |
| 23 | Vascular Surgery                     | 187,819                           | 2,753 (1)                                                                      | 20,786 (11)                                              | 1,443                                                     | 4,896           | 14   | 46   | 131   | 661   | 3,437  |
| 24 | Thoracic Surgery                     | 152,548                           | 3,982 (3)                                                                      | 12,969 (9)                                               | 3,769                                                     | 8,419           | 23   | 142  | 940   | 4,304 | 9,786  |
| 25 | Neonatology                          | 138,602                           | 12,724 (9)                                                                     | 1,426 (1)                                                | 1,271                                                     | 3,311           | 104  | 157  | 321   | 967   | 2,793  |
| 26 | Physical Medicine And Rehabilitation | 122,985                           | 4,618 (4)                                                                      | 16,973 (14)                                              | 634                                                       | 1,833           | 17   | 64   | 158   | 401   | 1,541  |
| 27 | Endocrinology                        | 83,977                            | 1,992 (2)                                                                      | 9,734 (12)                                               | 441                                                       | 2,620           | 7    | 42   | 109   | 274   | 589    |
| 28 | Critical Care Medicine               | 83,374                            | 5,133 (6)                                                                      | 217 (0)                                                  | 601                                                       | 898             | 39   | 129  | 379   | 563   | 1,477  |

|    |                                    |        |            |            |       |        |     |     |     |       |        |
|----|------------------------------------|--------|------------|------------|-------|--------|-----|-----|-----|-------|--------|
| 29 | Otolaryngology                     | 70,677 | 1,508 (2)  | 4,222 (6)  | 1,342 | 5,371  | 3   | 53  | 193 | 682   | 2,615  |
| 30 | Obstetrics                         | 55,386 | 2,883 (5)  | 60 (0)     | 688   | 1,074  | 80  | 157 | 287 | 766   | 1,454  |
| 31 | Colorectal Surgery                 | 46,733 | 644 (1)    | 2,354 (5)  | 2,309 | 5,677  | 8   | 94  | 457 | 1,866 | 5,660  |
| 32 | Plastic and Reconstructive Surgery | 40,993 | 5,376 (1)  | 3,141 (8)  | 5,846 | 14,288 | 8   | 125 | 761 | 4529  | 15,532 |
| 33 | Therapeutic Radiology              | 23,623 | 416 (2)    | 1,439 (6)  | 410   | 958    | 30  | 37  | 160 | 370   | 908    |
| 34 | Rheumatology                       | 21,410 | 586 (3)    | 1,748 (8)  | 313   | 1,336  | 0   | 30  | 116 | 262   | 576    |
| 35 | Ophthalmology                      | 19,218 | 552 (3)    | 1,259 (7)  | 581   | 2,418  | 0   | 39  | 123 | 320   | 1,099  |
| 36 | Gynecologic Oncology               | 16,640 | 325 (2)    | 10 (0)     | 327   | 319    | 63  | 198 | 209 | 304   | 861    |
| 37 | Dermatology                        | 11,680 | 370 (3)    | 1,218 (10) | 330   | 1,361  | 0   | 20  | 107 | 307   | 627    |
| 38 | Gynecology                         | 10,517 | 288 (3)    | 153 (1)    | 621   | 1,004  | 57  | 115 | 229 | 566   | 2,032  |
| 39 | Hospice & Palliative Medicine      | 8,235  | 686 (8)    | 20 (0)     | 218   | 217    | 61  | 69  | 135 | 281   | 507    |
| 40 | Geriatric Medicine                 | 7,251  | 1,031 (14) | 55 (0)     | 291   | 154    | 10  | 210 | 329 | 336   | 362    |
| 41 | Allergy and Immunology             | 7,015  | 232 (3)    | 699 (10)   | 180   | 491    | 0   | 18  | 84  | 179   | 372    |
| 42 | Genetics                           | 3,109  | 107 (3)    | 18 (1)     | 352   | 292    | 13  | 101 | 265 | 629   | 802    |
| 43 | Preventive Medicine                | 2,475  | 331 (14)   | 7 (0)      | 161   | 119    | 0   | 75  | 155 | 204   | 385    |
| 44 | Podiatry                           | 1,025  | 3 (0)      | 39 (4)     | 627   | 860    | 14  | 55  | 191 | 1,173 | 1,792  |
| 45 | Osteopathy                         | 832    | 201 (24)   | 5 (1)      | 882   | 10     | 877 | 877 | 877 | 877   | 900    |

<sup>a</sup>Total inpatient admissions with at least one claim submitted by the given provider category/specialty

<sup>b</sup>Admissions where at least one claim was submitted by a provider whose network status was unknown. Providers with unknown network status were counted as being “in-network” for the purposes of analyzing the incidence and financial liability associated with out-of-network billing.

<sup>c</sup>Total inpatient admissions with at least one out-of-network claim submitted by the given provider category/specialty

<sup>d</sup>Patient’s responsibility for out-of-network services, defined as the difference between the provider’s charge and the amount typically paid by the insurer for an in-network service. These amounts are in addition to any other out-of-pocket payments (e.g., payments for deductible and coinsurance). All dollar values are adjusted to 2018 dollars.

<sup>e</sup>Standard Deviation

**eTable 10. Annual Incidence and Magnitude of Out-of-Network Billing: Elective Inpatient Admissions**

|         | Number of Admissions <sup>a</sup> | Admissions With Out-of-Network Bill <sup>b</sup> , N (%) | Potential Out-of-Network Responsibility <sup>c</sup> (\$) |      |      |      |       |       |
|---------|-----------------------------------|----------------------------------------------------------|-----------------------------------------------------------|------|------|------|-------|-------|
|         |                                   |                                                          | Mean (SD <sup>d</sup> )                                   | 10th | 25th | 50th | 75th  | 90th  |
| 2010    | 262,480                           | 34,267 (13)                                              | 635 (1,192)                                               | 0    | 27   | 195  | 730   | 1,770 |
| 2011    | 248,988                           | 39,148 (16)                                              | 830 (1,414)                                               | 0    | 47   | 282  | 1,039 | 2,301 |
| 2012    | 341,502                           | 60,082 (18)                                              | 1,001 (1,948)                                             | 11   | 72   | 362  | 1,280 | 2,762 |
| 2013    | 344,445                           | 65,805 (19)                                              | 1,146 (1,806)                                             | 15   | 88   | 430  | 1,487 | 3,167 |
| 2014    | 303,844                           | 55,775 (18)                                              | 1,339 (2,057)                                             | 17   | 106  | 532  | 1,800 | 3,623 |
| 2015    | 305,902                           | 52,473 (17)                                              | 1,517 (2,203)                                             | 22   | 132  | 659  | 2,092 | 4,022 |
| 2016    | 342,732                           | 70,380 (21)                                              | 1,501 (2,285)                                             | 23   | 127  | 631  | 2,078 | 3,994 |
| Overall | 2,149,893                         | 377,930 (18)                                             | 1,190 (1,965)                                             | 13   | 85   | 431  | 1,557 | 3,283 |

<sup>a</sup>Total annual inpatient admissions to an in-network hospital

<sup>b</sup>Number of inpatient admissions with at least one claim submitted by an out-of-network provider.

<sup>c</sup>Patient's responsibility for out-of-network services, defined as the difference between the provider's charge and the amount typically paid by the insurer for an in-network service. These amounts are in addition to any other out-of-pocket payments (e.g., payments for deductible and coinsurance). All dollar values are adjusted to 2018 dollars.

<sup>d</sup>Standard deviation
